# Supplementary material
Source: MDPI journal article supplement (https://www.mdpi.com/2077-0472/12/11/1831)
Supplement: s1 [file s1]

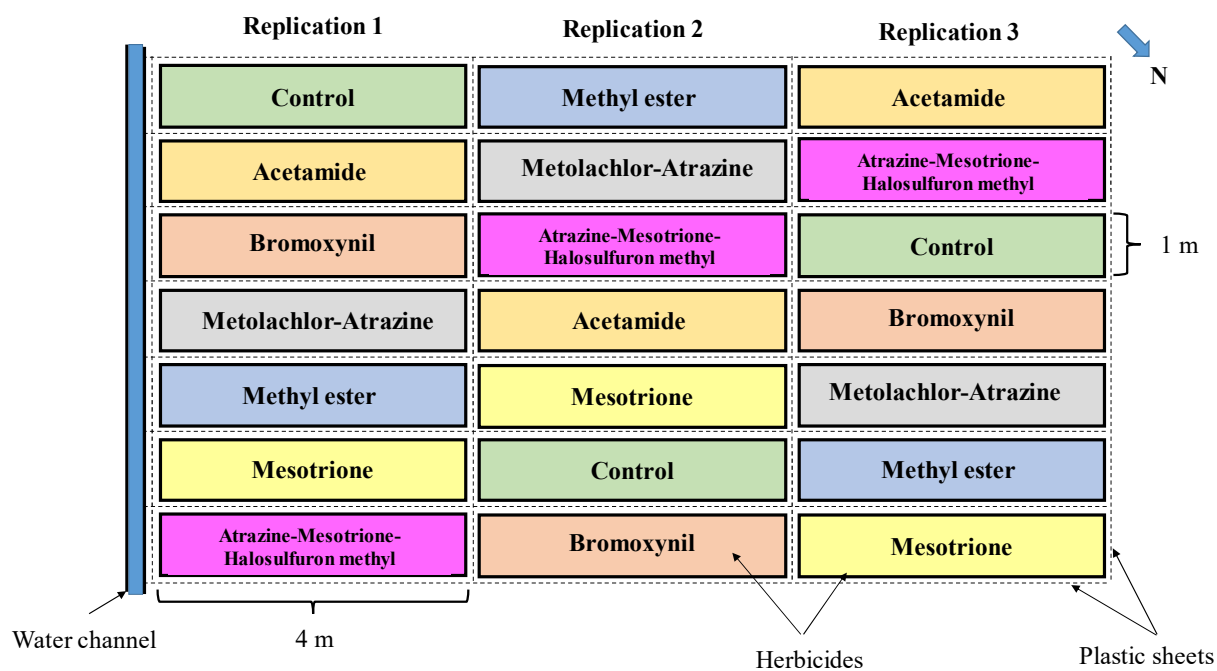

**Figure S1.** Layout plan for application of different pre- and post-emergence herbicides on *Dactyloctenium aegyptium*.

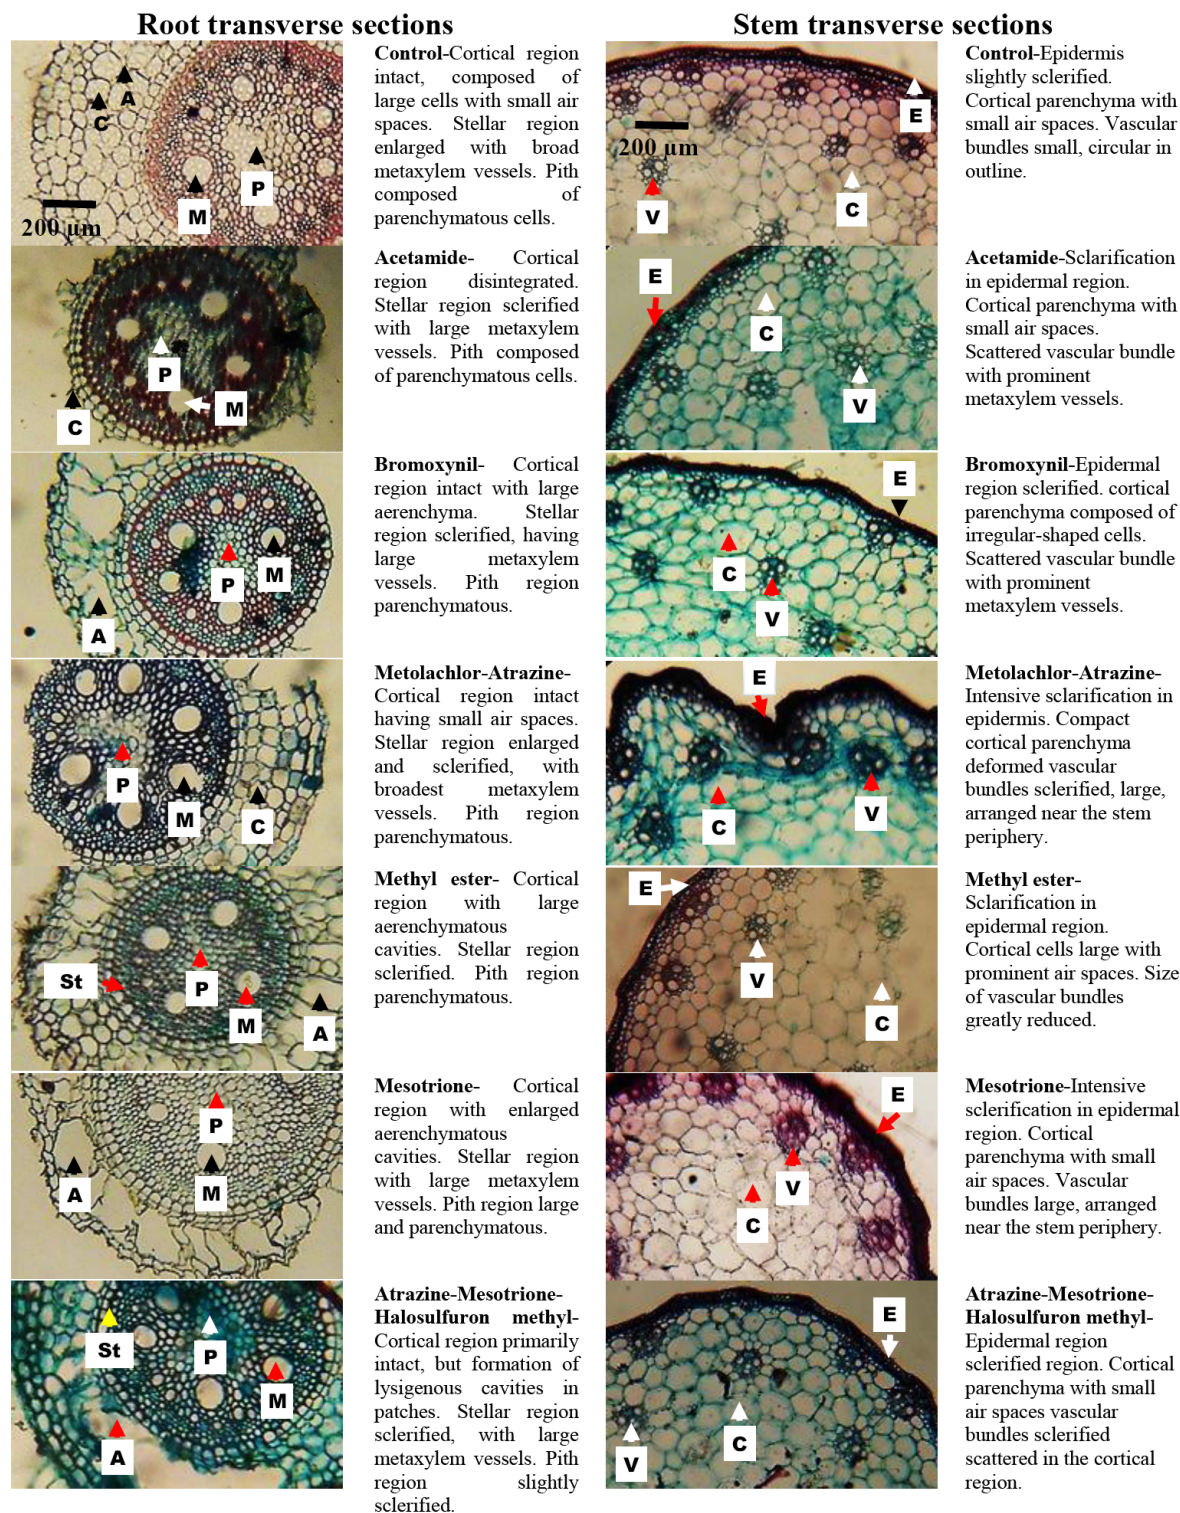

**Figure S2.** Response of root and stem anatomical characteristics of *Dactyloctenium aegyptium* to pre- and post-emergence herbicides. All figures are captured at 40X. Scales are given in the topmost figures.

A: Aerenchyma, C: Cortex, E: Epidermis, M: Metaxylem, P: Pith, St: Stellar region, V: Vascular bundle.



### Leaf sheath transverse sections

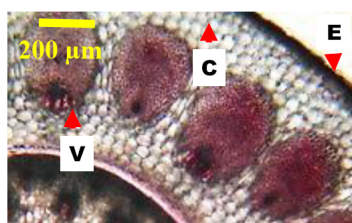

**Control-** Cortical cell compactly arranged. Vascular bundles large and obovate. Epidermis intensively sclerified.

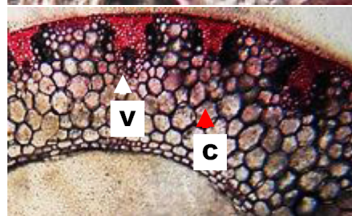

**Acetamide-** Cortical cells large, compactly arranged. Vascular bundles small. Intensive sclerification outside vascular bundles.

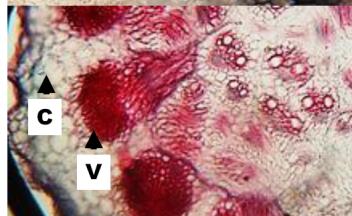

**Bromoxynil-** Cortical region comprised of irregular-shaped parenchymatous cells. Vascular bundles intensively sclerified.

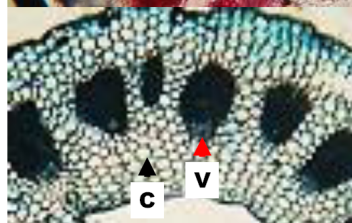

**Metolachlor-Atrazine-** Cortical cells consist of small, compact parenchymatous cells. Vascular bundles intensively sclerified.

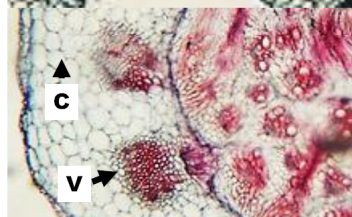

**Methyl ester-** Cortical cells large, parenchymatous and arranged in an irregular pattern. Vascular bundles slightly sclerified.

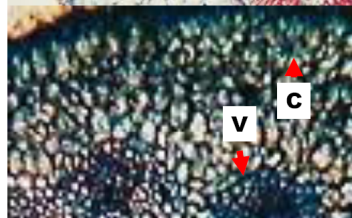

**Mesotrione-** Cortical parenchyma thick, composed of large, irregular-shaped parenchymatous cells. Vascular bundles small, slightly sclerified.

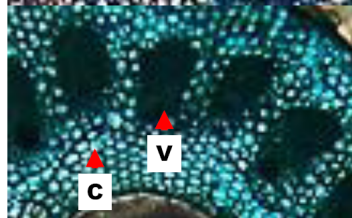

**Atrazine-Mesotrione-Halosulfuron methyl-** Thick leaf sheath, mainly having high proportion of cortical parenchyma and large vascular bundles.

### Leaf blade transverse sections

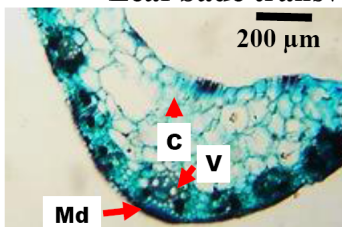

**Control-** Vascular bundles large. Cortical cell large. Midrib thick.

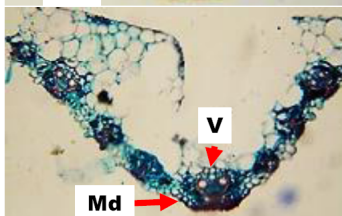

**Acetamide-** Midrib thick, central vascular bundle sclerified.

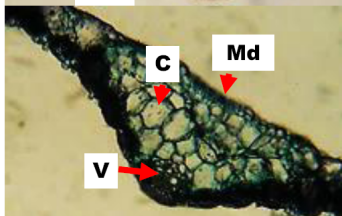

**Bromoxynil-** Midrib thin, vascular bundles small. Reduced and intensively sclerified cortical region.

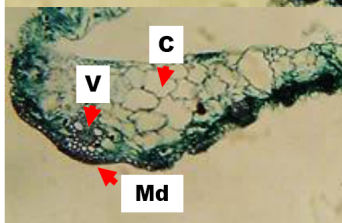

**Metolachlor-Atrazine-** Midrib thin, vascular bundles extremely reduced. Cortical parenchyma irregular-shaped.

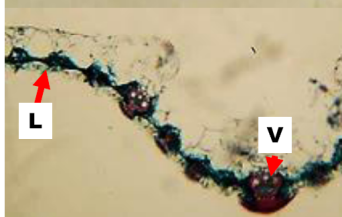

**Methyl ester-** Lamina thickness greatly reduced. Central vascular bundle large and extensively sclerified.

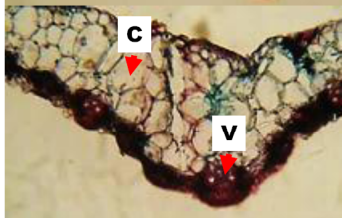

**Mesotrione-** Leaf shape deformed. Cortical cells large and irregular-shaped.

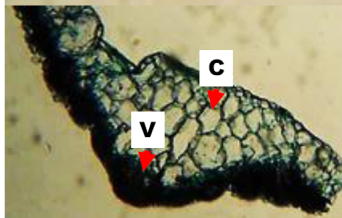

**Atrazine-Mesotrione-Halosulfuron methyl-** Vascular bundles small and extensively sclerified. Cortical cells large and irregular-shaped.

**Figure S3.** Response of leaf sheath and leaf blade anatomical characteristics of *Dactyloctenium aegyptium* to pre- and post-emergence herbicides. All figures are captured at 40X. Scales are given in the topmost figures. C: Cortex, E: Epidermis, L: Lamina, Md: Midrib, V: Vascular bundle

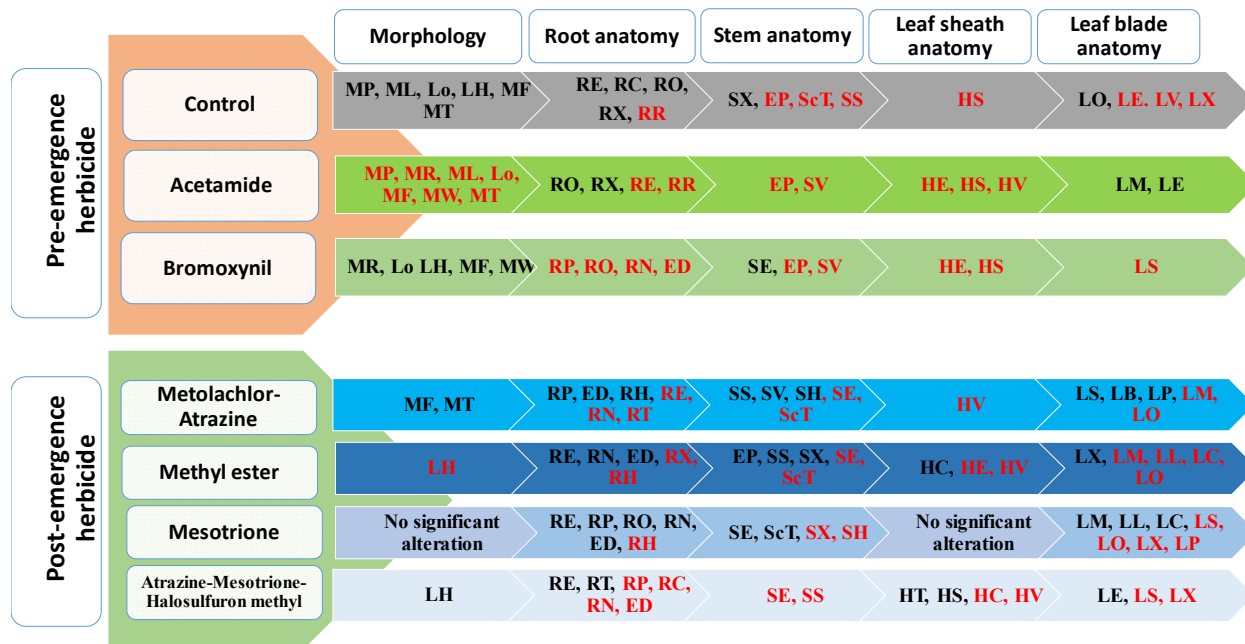

**Figure S4.** Proposed model of the overall impact of pre- and post-emergence herbicides on morpho-anatomical attributes of *Dactyloctenium aegyptium*

**Color of attributes:** Black font color indicates an increase over control, while red font color indicates a decrease over control

**Herbicides:** Cg-Caster Gold, Ct-Control, D-Dafli, Fg-Falisto Gold, Og-Orcus Gold, Pr-Primextra, Re-Relax

**Morphology:** Lo-Leaves per plant, MD-Root dry weight, MF-Root fresh weight, ML-Leaf area, MP-Plant height, MR-Root length, MT-Stem fresh weight, MU-Stem dry weight, MW-Leaf fresh weight, MX-Leaf dry weight

**Root anatomy:** ED-Endodermal cell area, EP-Epidermal cell area, RC-Cortical region thickness, RD-Root radius, RE-Epidermal thickness, RH-Phloem area, RN-Endodermal thickness, RO-Cortical cell area, RP-Epidermal cell area, RR-Pericycle thickness, RT-Pith area, RX-Metaxylem area

**Stem anatomy:** ScT-Cortical cell area, SC-Epidermal cell area, SE-Epidermal thickness, SH-Phloem area, SR-Stem radius, SS-Sclerenchymatous thickness, SV-Vascular bundle area, SX-Metaxylem area

**Leaf sheath anatomy:** HE-Epidermal thickness, HO-Cortical cell area, HS-Sclerenchymatous thickness, HT-Sheath thickness, HV-Vascular bundle area

**Leaf blade anatomy:** LC-Cortical cell area, LE-Epidermal thickness, LL-Lamina thickness, LM-Midrib thickness, LO-Mesophyll cell area, LP-Phloem area, LSL-Leaf sheath length, LS-Mesophyll thickness, LV-Vascular bundle area, LX-Metaxylem area
